# Supplementary material for: Knowing, Being, and Doing: Aboriginal and Non-Aboriginal Collaboration in Cancer Services
Source: PubMed Central journal article supplement — Qual Health Res. 2017 Feb 12;27(9):1316–29. doi: 10.1177/1049732316686750 (PMC5502907; doi:10.1177/1049732316686750), 2017-02-12
Supplement: Supplement_Table_1.pdf [file Supplement_Table_1.pdf]

**Table 1.** Research Participants ( $n = 41$ ).

| Participants             | Agencies                      | Roles                     | Interview Locations in the State of NSW |
|--------------------------|-------------------------------|---------------------------|-----------------------------------------|
| Aboriginal, $n = 20$     | Aboriginal Health             | Community elder           | Albury Wodonga                          |
| 6 managers               | Aboriginal Medical Services   | Manager/team leader       | Goulburn                                |
| 14 health workers        | Lands Council                 | Aboriginal health worker  | Griffith                                |
| 2 men                    |                               | Bringing them home worker | Gundagai                                |
| 18 women                 |                               | Chief executive officer   | Moruya                                  |
|                          |                               |                           | Narrandera                              |
|                          |                               |                           | Queanbeyan                              |
|                          |                               |                           | Wagga Wagga                             |
|                          |                               |                           | Wallaga Lake                            |
| Non-Aboriginal, $n = 21$ | Community health              | Oncology social worker    | Albury Wodonga                          |
| 4 managers               | Hospitals                     | Breast care nurse         | Bega                                    |
| 17 health workers        | Nongovernment cancer services | Cancer care coordinator   | Goulburn                                |
| 6 men                    |                               | Health manager            | Griffith                                |
| 15 women                 |                               | Doctor                    | Moruya                                  |
|                          |                               |                           | Narrandera                              |
|                          |                               |                           | Wagga Wagga                             |

*Note.* NSW = New South Wales.
